# Supplementary material for: Autoimmune encephalitis: proposed best practice recommendations for diagnosis and acute management
Source: HighWire-hosted journal article supplement (doi:10.1136/jnnp-2020-325300), 2021-03-01
Supplement: jnnp-2020-325300supp001_data_supplement.pdf [file jnnp-2020-325300supp001_data_supplement.pdf]

### Appendix 1: List of neuronal auto-antibodies

- A- Antibodies against intracellular antigens (classical onconeuroal antibodies):
- 1- Anti-Neuronal Nuclear Ab, Type 1 (ANNA1 or anti-Hu)
  - 2- Anti-Neuronal Nuclear Ab, Type 2 (ANN2 or anti-Ri)
  - 3- Anti-Neuronal Nuclear Ab, Type 3 (ANNA3)
  - 4- Anti-Glial Nuclear Ab, Type 1 (AGNA1)
  - 5- Purkinje Cell Cytoplasmic Ab Type 1 (PCA1 or anti-Yo)
  - 6- Purkinje Cell Cytoplasmic Ab Type 2 (PCA2; MAP1b-IgG)
  - 7- Purkinje Cell Cytoplasmic Ab Type Tr (PCATR)
  - 8- Amphiphysin Ab (AMPH)
  - 9- Collapsin response mediator protein 5 (CRMP-5-IgG or anti-CV2).
  - 10- Anti-Ma1/Ma2 (or anti-Ta)
  - 11- kelch-like protein 11 Ab (KLHL11)
  - 12- Neuronal intermediate filament and internexin Ab (NIF)
  - 13- Adenylate kinase 5 Ab (anti-AK5)
  - 14- Glutamic acid decarboxylase 65 Ab (GAD65): Not considered a classical onconeuroal antibody and is associated with clinical features similar to antibodies against surface antigens.
  - 15- Glial fibrillary acidic protein Ab (GFAP): antibody against astrocyte GFAP. Not considered a classical onconeuroal antibody and is associated with clinical features similar to antibodies against surface antigens.
- B- Antibodies against neuromuscular and ganglionic synaptic antigens:
- 1- P/Q-Type Calcium Channel Ab (PQ-VGCC)
  - 2- N-Type Calcium Channel Ab (N-VGCC)
  - 3- Acetyl Choline Receptor (Muscle) Binding Ab (AChR-B)
  - 4- Acetyl Choline Receptor (Muscle) Modulating Ab (AChR-M)
  - 5- Acetyl Choline Receptor Ganglionic Neuronal Ab (ganglionic AChR)
  - 6- Striational (Muscle) antibodies (STR).
- C- Antibodies against surface antigens:
- 1- N-Methyl D-Aspartate Receptor Ab (NMDAR)
  - 2-  $\alpha$ -amino-3-hydroxy-5-methyl-4-isoxazolepropionic acid receptor Ab (AMPA)
  - 3- Gamma-Amino butyric acid A Receptor Ab (GABA-A-R)
  - 4- Gamma-Amino butyric acid B Receptor Ab (GABA-B-R)
  - 5- Neuronal voltage-gated potassium channel Ab (VGKC)
  - 6- Leucine-rich glioma inactivated Ab (LGI-1): part of the VGKC receptor complex
  - 7- Contactin-associated protein-like 2 Ab (CASPR2): part of the VGKC receptor complex.
  - 8- Dipeptidyl-peptidase-like protein 6 Ab (DPPX)
  - 9- Metabotropic glutamate receptor 1 Ab (mGluR1) and anti-Homer-3
  - 10- Metabotropic glutamate receptor 5 Ab (mGluR5)
  - 11- Glycine receptor Ab.
  - 12- Dopamine receptor 1 Ab (D1)
  - 13- Dopamine receptor 2 Ab (D2)
  - 14- IgLON5 Ab
  - 15- Neurexin-3 $\alpha$  Ab
  - 16- Aquaporin 4 water channel (Astrocyte) Ab (AQP4)

17- Myelin oligodendrocyte glycoprotein (Oligodendrocyte) Ab (MOG)
